# Supplementary material for: Co-Occurrence of Domestic Dogs and Gastropod Molluscs in Public Dog-Walking Spaces and Implications for Infection with Angiostrongylus vasorum: A Preliminary Study
Source: MDPI journal article supplement (doi:10.3390/ani11092577), 2021-09-02
Supplement: s1 [file s1]

| Model term | Pairwise comparison                    | Likelihood ratio parameter estimate | SE    | z     | p         |
|------------|----------------------------------------|-------------------------------------|-------|-------|-----------|
| Habitat    | Natural grassland vs hardstanding      | 2.844                               | 0.439 | 6.481 | «0.001*** |
|            | Natural grassland vs amenity grassland | 2.082                               | 0.278 | 7.480 | «0.001*** |
|            | Woodland/scrub vs amenity grassland    | 2.766                               | 0.382 | 7.251 | «0.001*** |
|            | Woodland/scrub vs hardstanding         | 3.528                               | 0.511 | 6.911 | «0.001*** |

**SI Table S1.** Parameter estimates and pairwise comparisons for factors predicting gastropod presence/absence (0,1) across 7 study sites in Brighton and Hove and surrounding areas

| Model term | Pairwise comparison                 | Likelihood ratio parameter estimate | SE    | z     | p       |
|------------|-------------------------------------|-------------------------------------|-------|-------|---------|
| Habitat    | Woodland/scrub vs natural grassland | 0.443                               | 0.231 | 1.922 | < 0.05* |
|            | Woodland/scrub vs amenity grassland | 0.498                               | 0.290 | 1.721 | 0.055·  |
|            | Woodland/scrub vs hardstanding      | 0.870                               | 0.522 | 1.669 | 0.065·  |

**SI Table S2.** Parameter estimates and pairwise comparisons for factors predicting gastropod relative abundance across 7 study sites in Brighton and Hove and surrounding areas. · approaches significance.

| Model term                    | Pairwise comparison                    | Likelihood ratio parameter estimate | SE    | z      | p          |
|-------------------------------|----------------------------------------|-------------------------------------|-------|--------|------------|
| Habitat                       | Natural grassland vs hardstanding      | 2.470                               | 0.631 | 3.193  | «0.001***  |
|                               | Natural grassland vs amenity grassland | 1.741                               | 0.340 | 5.119  | «0.001***  |
|                               | Woodland/scrub vs amenity grassland    | 0.283                               | 0.415 | 7.919  | «0.001***  |
|                               | Woodland/scrub vs hardstanding         | 4.013                               | 0.681 | 5.893  | «0.001***  |
|                               | Woodland/scrub vs Natural grassland    | 1.543                               | 0.348 | 4.431  | «0.001***  |
| Minimum relative humidity (%) | Continuous                             | -2.068                              | 0.597 | -3.465 | < 0.001*** |
| Time of day                   | PM vs AM                               | 1.113                               | 0.335 | 3.319  | < 0.001*** |
|                               | PM vs DAY                              | 0.884                               | 0.321 | 2.759  | < 0.01**   |

**SI Table S3.** Parameter estimates and pairwise comparisons for factors predicting presence/absence of *Arion ater* and *hortensis* aggregates, and *Cornu aspersum* (taxa harbouring medium and high prevalence of *Angiostrongylus vasorum* from the literature) across 7 study sites in Brighton and Hove and surrounding areas.

| Model term                                 | Pairwise comparison                    | Likelihood ratio parameter estimate | SE    | z      | p         |
|--------------------------------------------|----------------------------------------|-------------------------------------|-------|--------|-----------|
| Time of day                                | AM vs PM                               | 1.892                               | 0.286 | 6.627  | «0.001*** |
|                                            | MID vs PM                              | 1.886                               | 0.300 | 6.291  | «0.001*** |
| Habitat                                    | Hardstanding vs Natural grassland      | 1.306                               | 0.346 | 3.771  | <0.001*** |
|                                            | Hardstanding vs Woodland/scrub         | 2.078                               | 0.358 | 5.804  | «0.001*** |
|                                            | Amenity grassland vs Natural grassland | 0.622                               | 0.281 | 2.215  | <0.05*    |
|                                            | Amenity grassland vs Woodland/scrub    | 1.393                               | 0.283 | 4.922  | «0.001*** |
|                                            | Natural grassland vs woodland/scrub    | 0.771                               | 0.272 | 2.831  | <0.01**   |
| Footpath                                   | On footpath versus off footpath        | 0.481                               | 0.227 | 2.124  | <0.05*    |
| Minimum relative humidity (%) [continuous] |                                        | -0.016                              | 0.009 | -1.878 | 0.060·    |

**SI Table S4.** Parameter estimates and pairwise comparisons for significant effects predicting dog presence/absence (0,1) across 7 study sites in Brighton and Hove and surrounding areas. AM = 06.30-10.30; MID (midday) = 12.30-16.30; PM = 18.30-22.30. · approaches significance.

| Model term                                 | Pairwise comparison                    | Likelihood ratio parameter estimate | SE    | z      | p          |
|--------------------------------------------|----------------------------------------|-------------------------------------|-------|--------|------------|
| Time of day                                | AM vs PM                               | 0.730                               | 0.174 | 4.210  | « 0.001*** |
|                                            | PM vs MID                              | -0.615                              | 0.176 | -3.502 | < 0.001*** |
| Habitat                                    | Amenity grassland vs Natural grassland | 0.642                               | 0.123 | 5.210  | « 0.001*** |
|                                            | Hardstanding vs Natural grassland      | 0.497                               | 0.133 | 3.727  | < 0.001*** |
|                                            | Woodland/scrub vs Natural grassland    | 0.712                               | 0.118 | 6.011  | « 0.001*** |
| Footpath                                   | On footpath versus off footpath        | 0.514                               | 0.256 | 2.011  | <0.05*     |
| Minimum relative humidity (%) [continuous] |                                        | -0.012                              | 0.003 | -3.935 | « 0.001*** |

**SI Table S5.** Parameter estimates and pairwise comparisons for significant effects predicting dog (*Canis lupus familiaris*) abundance across 7 study sites in Brighton and Hove and surrounding areas. AM = 06.30-10.30; MID (midday) = 12.30-16.30; PM = 18.30-22.30. · approaches significance.
